# Supplementary material for: A Novel and Cost-Effective CsVO3 Quantum Dots for Optoelectronic and Display Applications
Source: MDPI journal article supplement (doi:10.3390/nano12162864), 2022-08-19
Supplement: s1 [file s1]

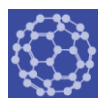

# A Novel and Cost-Effective CsVO<sub>3</sub> Quantum Dots for Optoelectronic and Display Applications

Ganji Seeta Rama Raju <sup>1</sup>, Ganji Lakshmi Varaprasad <sup>2</sup>, Jeong-Hwan Lee <sup>3</sup>, Jin Young Park <sup>4</sup>, Nilesh R. Chodankar <sup>1</sup>, Kugalur Shanmugam Ranjith <sup>1</sup>, Eluri Pavitra <sup>2,\*</sup>, Yun Suk Huh <sup>2,\*</sup> and Young-Kyu Han <sup>1,\*</sup>

<sup>1</sup> Department of Energy and Materials Engineering, Dongguk University-Seoul, Seoul 04620, Korea

<sup>2</sup> Department of Biological Engineering, Biohybrid Systems Research Center (BSRC), Inha University, Incheon 22212, Korea

<sup>3</sup> Department of Materials Science and Engineering, Inha University, Incheon 22212, Korea

<sup>4</sup> Department of Electrical, Electronics and Software Engineering, Pukyong National University, Yongdang Campus, Busan 48547, Korea

\* Correspondence: pavitra@inha.ac.kr (E.P.); yunsuk.huh@inha.ac.kr (Y.S.H.); ykenergy@dongguk.edu (Y.-K.H.)

## Characterizations

The morphology of the CsVO<sub>3</sub> QDs and CsVO<sub>3</sub> nanosheets self-assembled microflower-like particles were examined using field-emission scanning electron microscopy (FE-SEM) (Hitachi-SU8010, Japan) and field-emission transmission electron microscopy (FE-TEM: JEM-2100F/JEOL) measurements. The X-ray diffraction (XRD) patterns of CsVO<sub>3</sub> microflower-like particles were measured using X'Pert Pro multipurpose X-ray diffractometer (PANalytical) with ceramic Cu target (CuKα = 1.5406 Å), X-ray generator of 3kW 60kV/60mA, and scan speed of 1 deg/sec. The energy dispersive X-ray spectrometer attached to the FE-SEM instrument (PANalytical, Holland) was used to verify the elemental composition of CsVO<sub>3</sub> QDs and microflower-like particles. The photoluminescence emission spectrum of CsVO<sub>3</sub> microflower-like particles was measured using a Photon Technology International (PTI, USA) fluorimeter with a xenon arc lamp power of 60 W. The absorption spectra of CsVO<sub>3</sub> QDs were recorded on a V-770 UV-vis spectrophotometer (JASCO International Co. Ltd., Japan).

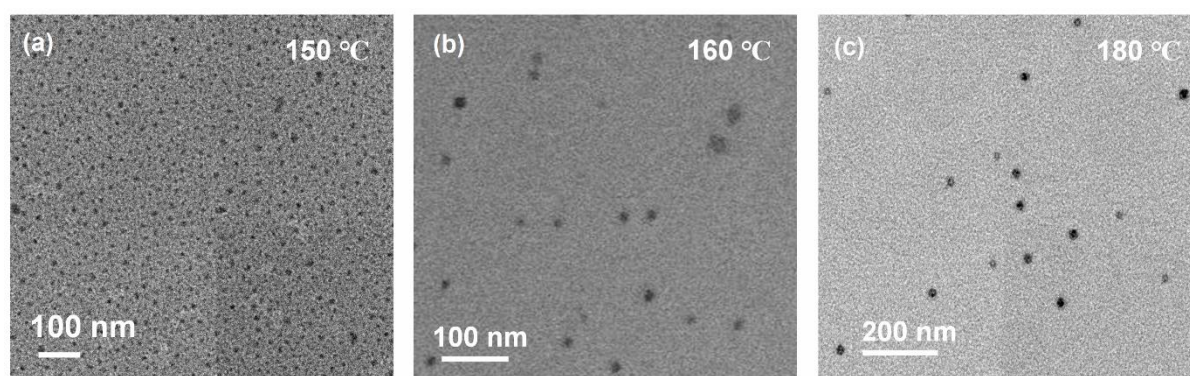

**Figure S1.** (a–c) FE-TEM images of the CsVO<sub>3</sub> QDs synthesized at 150 °C, 160 °C, and 180 °C, respectively.

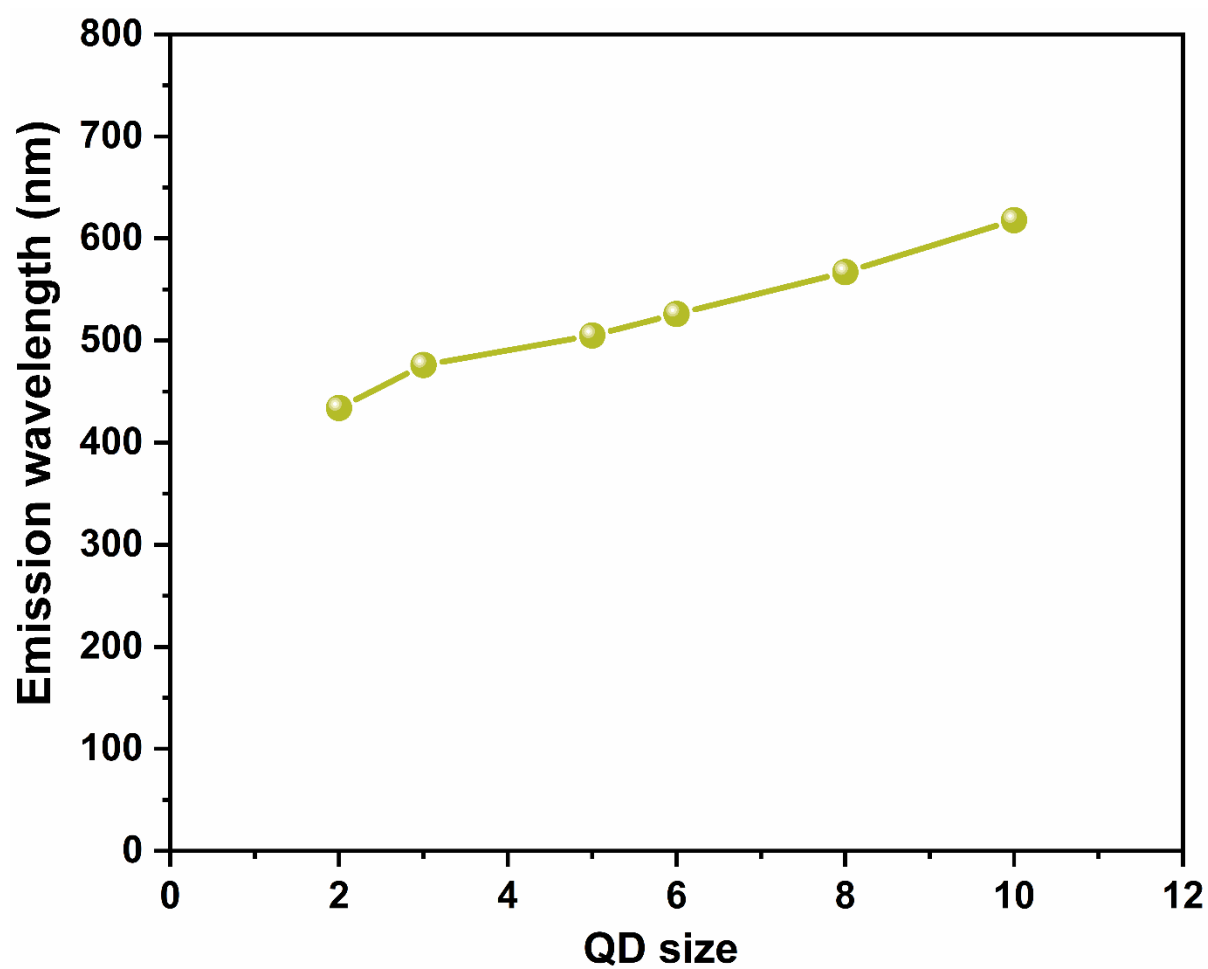

Figure S2. Emission wavelength versus CsVO3 QDs size.
